# Supplementary material for: Early‐life single‐episode sevoflurane exposure impairs social behavior and cognition later in life
Source: PubMed Central journal article supplement (PMC5036436; doi:10.1002/brb3.514), 2016-07-04

**Supplementary data:**

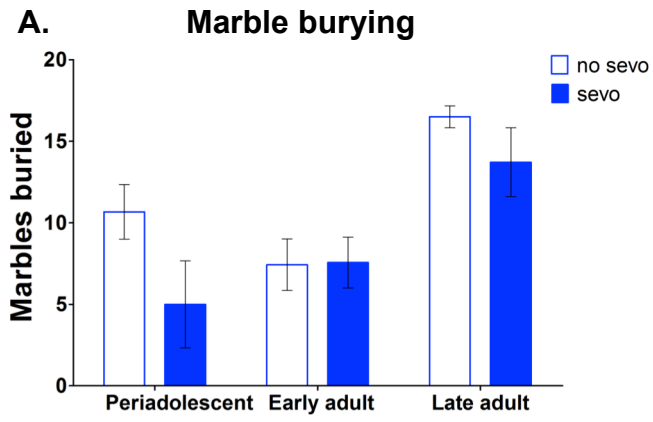

**B. Repetitive self-grooming**

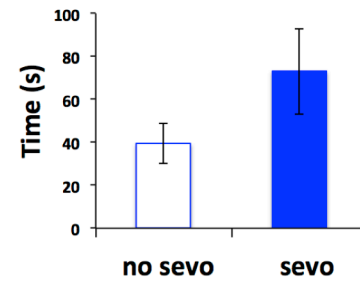

Supplement: BRB3-6-e00514-s001.pdf [file BRB3-6-e00514-s001.pdf]
